# Supplementary material for: Impact of Staphylococcus aureus colonization and skin abscesses on formation of human anti-αGal antibodies
Source: Springer Nature journal article supplement (doi:10.1007/s00430-025-00833-3), 2025-05-13
Supplement: MOESM1 [file 430_2025_833_MOESM1_ESM.pdf]

# Impact of *Staphylococcus aureus* colonization and skin abscesses on formation of human anti-αGal antibodies

## Supplementary Material

| <b>Supplementary Table 1.</b> The following abscess diagnoses based on the International Classification of Diseases, 10th edition (ICD-10) were included when occurring as primary diagnosis, secondary diagnosis, and/or underlying medical condition. |                                                                              |                    |                                                                                                      |                 |
|---------------------------------------------------------------------------------------------------------------------------------------------------------------------------------------------------------------------------------------------------------|------------------------------------------------------------------------------|--------------------|------------------------------------------------------------------------------------------------------|-----------------|
| <b>NPR code</b>                                                                                                                                                                                                                                         | <b>Text (Danish)</b>                                                         | <b>ICD-10 code</b> | <b>Text (English)</b>                                                                                | <b>Cases, n</b> |
| H000A                                                                                                                                                                                                                                                   | Absces øjenlåg                                                               | H00.0              | Hordeolum and other deep inflammation of eyelid (abscess)                                            | 0               |
| H050A                                                                                                                                                                                                                                                   | Absces øjenhule                                                              | H05.0              | Acute inflammation of orbit (abscess)                                                                | 0               |
| H440A                                                                                                                                                                                                                                                   | Absces glaslegeme                                                            | H44.0              | Purulent endophthalmitis (Vitreous abscess)                                                          | 0               |
| H6000+A                                                                                                                                                                                                                                                 | Absces i ydre øre og øregang                                                 | H60.0              | Abscess of external ear (Boil)                                                                       | 0               |
| J340A                                                                                                                                                                                                                                                   | Absces i næsen                                                               | J34.0              | Abscess, furuncle and carbuncle of nose                                                              | 0               |
| J36                                                                                                                                                                                                                                                     | Absces i hals                                                                | J36                | Peritonsillar abscess                                                                                | 0               |
| <b>J390</b>                                                                                                                                                                                                                                             | <b>Retro- eller parafaryngeal abscess</b>                                    | <b>J39.0</b>       | <b>Retropharyngeal and parapharyngeal abscess</b>                                                    | <b>&lt; 5</b>   |
| J391                                                                                                                                                                                                                                                    | Absces pharynx (inkl. undergrupper)                                          | J39.1              | Other abscess of pharynx                                                                             | 0               |
| K130A                                                                                                                                                                                                                                                   | Absces i labii oris                                                          | K13.0              | Diseases of lips (Cheilitis)                                                                         | 0               |
| <b>K122A+B</b>                                                                                                                                                                                                                                          | <b>Absces submandibularis og abscess i munden</b>                            | <b>K12.2</b>       | <b>Cellulitis and abscess of mouth (Cellulitis of mouth (floor) OR Submandibular abscess)</b>        | <b>&lt; 5</b>   |
| K113                                                                                                                                                                                                                                                    | Absces i spytkirtler                                                         | K11.3              | Abscess of salivary gland                                                                            | 0               |
| <b>K610A</b>                                                                                                                                                                                                                                            | <b>Perianalabsces</b>                                                        | <b>K61.0</b>       | <b>Anal abscess</b>                                                                                  | <b>38</b>       |
| K614                                                                                                                                                                                                                                                    | Intrasfinkterisk analabsces                                                  | K61.4              | Intrasphincteric abscess                                                                             | 0               |
| L02C                                                                                                                                                                                                                                                    | Hudabsces UNS                                                                | L02                | Cutaneous abscess, furuncle and carbuncle (unspecified)                                              | 0               |
| L020C                                                                                                                                                                                                                                                   | Absces i ansigtet                                                            | L02.0              | Cutaneous abscess, furuncle and carbuncle of face                                                    | 0               |
| L021C                                                                                                                                                                                                                                                   | Absces på hals                                                               | L02.1              | Cutaneous abscess, furuncle and carbuncle of neck                                                    | 0               |
| L022N                                                                                                                                                                                                                                                   | Absces på ryggen                                                             | L02.2              | Cutaneous abscess, furuncle and carbuncle of trunk (back [any part, except buttock])                 | 7               |
| L022P                                                                                                                                                                                                                                                   | Absces på kroppen UNS                                                        | L02.2              | Cutaneous abscess, furuncle and carbuncle of trunk (unspecified)                                     | < 5             |
| L022 (O+Q+R)                                                                                                                                                                                                                                            | Absces i navlen, perineum eller bugvæggen.                                   | L02.2              | Cutaneous abscess, furuncle and carbuncle of trunk (Umbilicus, Perineum, or Abdominal wall)          | 0               |
| L022S                                                                                                                                                                                                                                                   | Absces på brystvæggen                                                        | L02.2              | Cutaneous abscess, furuncle and carbuncle of trunk (Chest wall)                                      | < 5             |
| L022T                                                                                                                                                                                                                                                   | Absces i lysken                                                              | L02.2              | Cutaneous abscess, furuncle and carbuncle of trunk (Groin)                                           | 8               |
| L023C                                                                                                                                                                                                                                                   | Absces i sædregion                                                           | L02.3              | Cutaneous abscess, furuncle and carbuncle of buttock                                                 | < 5             |
| L024                                                                                                                                                                                                                                                    | Abscesser i huden på ekstremiteter (alle undergrupper)                       | L02.4              | Cutaneous abscess, furuncle and carbuncle of limb                                                    | 37              |
| L028C                                                                                                                                                                                                                                                   | Abscesser på hoved                                                           | L02.8              | Cutaneous abscess, furuncle and carbuncle of other sites (head)                                      | < 5             |
| L88 (ekskl. L889 & L889C)                                                                                                                                                                                                                               | Pusdannelse i huden ekskl. 'Pyoderma gangraenosum' & 'pyoderma phagedenica.' | Not defined        | Accumulation of purulent material in skin excluding 'Pyoderma gangrenosum' and 'Phagedenic pyoderma' | 0               |
| <b>Total</b>                                                                                                                                                                                                                                            |                                                                              |                    |                                                                                                      | <b>106</b>      |
| In red: NPR codes for abscess types with case numbers > 0 where <i>Staphylococcus aureus</i> is an unusual cause (J390 [1], K122A+B [2, 3], and K610A [4, 5]). These diagnoses were categorized as non-skin abscesses.                                  |                                                                              |                    |                                                                                                      |                 |
| The use of '<5' for small numbers adheres to anonymization requirements to protect participant privacy.                                                                                                                                                 |                                                                              |                    |                                                                                                      |                 |

**Supplementary Data File:** Impact of *Staphylococcus aureus* colonization and skin abscesses on formation of human anti- $\alpha$ Gal antibodies

| Supplementary Table 2. Plasma anti-αGal antibody concentration in healthy individuals before and after abscess according to follow-up time.                                                                                                           |                 |                             |                |                             |      |
|-------------------------------------------------------------------------------------------------------------------------------------------------------------------------------------------------------------------------------------------------------|-----------------|-----------------------------|----------------|-----------------------------|------|
| Stratification                                                                                                                                                                                                                                        | Cases, <i>n</i> | Mean anti-αGal in mg/L (CI) |                | Relative concentration (CI) | P    |
|                                                                                                                                                                                                                                                       |                 | Before abscess              | After abscess  |                             |      |
| Females                                                                                                                                                                                                                                               |                 |                             |                |                             |      |
| < 187 days                                                                                                                                                                                                                                            | 24              | 13 (7.3, 24)                | 16 (11, 25)    | 1.3 (0.94, 1.6)             | 0.09 |
| ≥ 187 days                                                                                                                                                                                                                                            | 22              | 12 (6.9, 23)                | 13 (7.8, 24)   | 1.1 (0.86, 1.3)             | 0.51 |
| Males                                                                                                                                                                                                                                                 |                 |                             |                |                             |      |
| < 187 days                                                                                                                                                                                                                                            | 29              | 11 (6.1, 20)                | 13 (7.2, 22)   | 1.2 (0.95, 1.4)             | 0.13 |
| ≥ 187 days                                                                                                                                                                                                                                            | 31              | 9.8 (6.0, 16)               | 8.8 (5.4, 15)  | 0.9 (0.77, 1.1)             | 0.18 |
| Age 17-43 years                                                                                                                                                                                                                                       |                 |                             |                |                             |      |
| < 187 days                                                                                                                                                                                                                                            | 28              | 12 (7.0, 22)                | 15 (9.2, 25)   | 1.2 (0.95, 1.5)             | 0.09 |
| ≥ 187 days                                                                                                                                                                                                                                            | 25              | 11 (6.5, 19)                | 12 (7.3, 20)   | 1.1 (0.89, 1.3)             | 0.42 |
| Age 44-67 years                                                                                                                                                                                                                                       |                 |                             |                |                             |      |
| < 187 days                                                                                                                                                                                                                                            | 25              | 11 (6.0, 20)                | 13 (7.5, 22)   | 1.2 (0.94, 1.4)             | 0.15 |
| ≥ 187 days                                                                                                                                                                                                                                            | 28              | 11 (6.2, 19)                | 9.2 (5.4, 16)  | 0.87 (0.75, 1.0)            | 0.09 |
| ABO blood group B or AB:                                                                                                                                                                                                                              |                 |                             |                |                             |      |
| < 187 days                                                                                                                                                                                                                                            | 6               | 2.1 (0.86, 7.3)             | 4.5 (3.3, 6.7) | 2.1 (0.84, 4.3)             | 0.12 |
| ≥ 187 days                                                                                                                                                                                                                                            | 10              | 5.6 (2.0, 19)               | 5.2 (2.0, 15)  | 0.92 (0.7, 1.2)             | 0.54 |
| ABO blood group O or A:                                                                                                                                                                                                                               |                 |                             |                |                             |      |
| < 187 days                                                                                                                                                                                                                                            | 47              | 15 (9.7, 22)                | 16 (11, 24)    | 1.1 (0.98, 1.3)             | 0.09 |
| ≥ 187 days                                                                                                                                                                                                                                            | 43              | 13 (8.6, 18)                | 12 (8.3, 18)   | 0.98 (0.85, 1.1)            | 0.81 |
| Non-skin abscess                                                                                                                                                                                                                                      |                 |                             |                |                             |      |
| < 187 days                                                                                                                                                                                                                                            | 22              | 14 (7.9, 24)                | 14 (8.4, 26)   | 1.0 (0.87, 1.3)             | 0.66 |
| ≥ 187 days                                                                                                                                                                                                                                            | 21              | 15 (9.5, 24)                | 14 (8.4, 24)   | 0.93 (0.81, 1.1)            | 0.34 |
| Skin abscess                                                                                                                                                                                                                                          |                 |                             |                |                             |      |
| < 187 days                                                                                                                                                                                                                                            | 31              | 10 (5.8, 19)                | 14 (8.5, 22)   | 1.3 (1.0, 1.7)              | 0.01 |
| ≥ 187 days                                                                                                                                                                                                                                            | 32              | 8.7 (5.1, 15)               | 8.6 (5.3, 15)  | 0.99 (0.82, 1.2)            | 0.96 |
| The 95% confidence intervals (CI) were calculated by bootstrap with 5000 iterations. The p-values are the likelihood that the average relative concentration differs from 1 and were calculated by a two-sided permutation test with 5000 iterations. |                 |                             |                |                             |      |

**Supplementary Data File:** Impact of *Staphylococcus aureus* colonization and skin abscesses on formation of human anti- $\alpha$ Gal antibodies

**Supplementary Table 3.** Plasma anti- $\alpha$ Gal antibody concentration in healthy individuals with later abscess (cases) and individuals without abscess (controls).

| Stratification   | Pairs, <i>n</i> | Mean anti- $\alpha$ Gal in mg/L (CI) |               | Relative concentration (CI) | P    |
|------------------|-----------------|--------------------------------------|---------------|-----------------------------|------|
|                  |                 | Case<br>(before abscess)             | Control       |                             |      |
| All:             | 106             | 11 (8.5, 15)                         | 11 (8.9, 14)  | 0.99 (0.67, 1.5)            | 0.96 |
| Sex:             |                 |                                      |               |                             |      |
| Females          | 46              | 13 (8.4, 19)                         | 10 (7.5, 14)  | 1.22 (0.71, 2.1)            | 0.47 |
| Males            | 60              | 10 (7.0, 15)                         | 12 (8.5, 18)  | 0.84 (0.48, 1.5)            | 0.56 |
| Age:             |                 |                                      |               |                             |      |
| 17–43 yrs.       | 53              | 12 (7.9, 17)                         | 9.5 (6.9, 13) | 1.22 (0.75, 2.0)            | 0.43 |
| 44–67 yrs.       | 53              | 11 (7.1, 16)                         | 13 (9.4, 19)  | 0.81 (0.43, 1.5)            | 0.49 |
| ABO blood group: |                 |                                      |               |                             |      |
| B or AB          | 16              | 3.9 (1.7, 9.2)                       | 7.4 (3.9, 13) | 0.52 (0.16, 1.8)            | 0.32 |
| O or A           | 90              | 14 (10, 18)                          | 12 (9.4, 16)  | 1.11 (0.74, 1.7)            | 0.62 |

The 95% confidence intervals (CI) were calculated by bootstrap with 5000 iterations. The p-values are the likelihood that the average relative concentration differs from 1 and were calculated by a two-sided permutation test with 5000 iterations. The limits of the CI 'Before abscess' are not exactly the same as in Table 2 (main text) as the bootstrap calculations were made separately for the two tables.

**Supplementary Data File:** Impact of *Staphylococcus aureus* colonization and skin abscesses on formation of human anti- $\alpha$ Gal antibodies

**Supplementary Fig. 1.** Association between plasma anti- $\alpha$ Gal antibody concentration and age in recurrent skin abscess patients and patient controls

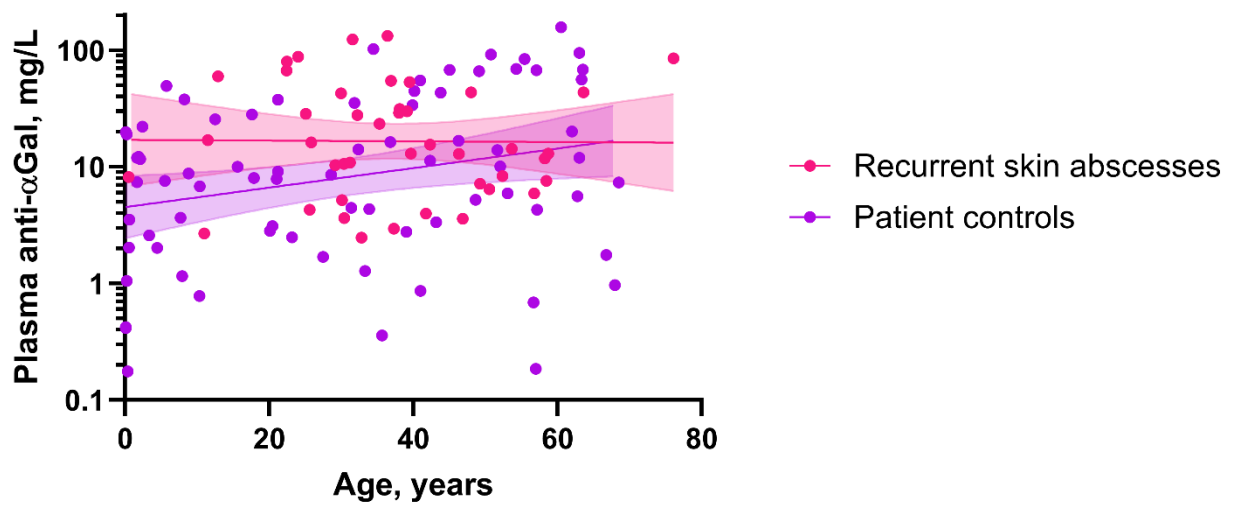

Data from Fig. 3 in the main text are presented, showing antibody levels as a function of age. Linear regression analysis of log<sub>10</sub>-transformed antibody levels revealed no significant difference in slopes between the two groups: -0.00031 (95% CI: -0.010–0.0097) for patients with recurrent skin abscesses and 0.0084 (95% CI: 0.0013–0.015) for patient controls ( $P = 0.22$ ). However, the slope for the patient control group was significantly greater than zero, indicating a positive association between age and antibody levels. This suggests that longer exposure to various infections, as individuals age, may increase plasma levels of anti- $\alpha$ Gal antibodies in the control group.

**Supplementary Table 4.** The required increase in relative concentration of an antibody subset comprising 1% of the total antibodies to achieve a 30% increase in total antibody concentration.

If total concentration of anti-αGal antibodies ' $C_t$ ' increase by 30% after abscess relative to their concentration before, then:

$$C_{t,after} = 1.3 \times C_{t,before}$$

If total anti-αGal antibodies contain one subset denoted ' $\alpha S$ ' and the remaining antibodies are denoted ' $other$ ', then:

$$C_{\alpha S,after} + C_{other,after} = 1.3 \times (C_{\alpha S,before} + C_{other,before})$$

If only the concentration of the  $\alpha S$  antibody subset is influenced by the abscess, then:

$$C_{\alpha S,after} + C_{other,before} = 1.3 \times (C_{\alpha S,before} + C_{other,before})$$

If the  $\alpha S$  antibody subset comprised 1% of the total anti-αGal antibodies before abscess (i.e.,  $C_{other,before} = 99 \times C_{\alpha S,before}$ ), then:

$$C_{\alpha S,after} + 99C_{\alpha S,before} = 1.3 \times (C_{\alpha S,before} + 99C_{\alpha S,before}) = 1.3 \times 100C_{\alpha S,before}$$

Thus:

$$C_{\alpha S,after} = 130C_{\alpha S,before} - 99C_{\alpha S,before} = 31C_{\alpha S,before}$$

And:

$$\frac{C_{\alpha S,after}}{C_{\alpha S,before}} = 31$$

Thus, the  $\alpha S$  subset is required to increase 31-fold in concentration to cause a 30% increase in total anti-αGal antibody concentration.

**Supplementary Data File:** Impact of *Staphylococcus aureus* colonization and skin abscesses on formation of human anti- $\alpha$ Gal antibodies

References:

1. Ridder, G.J., et al., *Spectrum and management of deep neck space infections: an 8-year experience of 234 cases*. Otolaryngol Head Neck Surg, 2005. **133**(5): p. 709-14. <https://doi.org/10.1016/j.otohns.2005.07.001>.
2. Boscolo-Rizzo, P. and M.C. Da Mosto, *Submandibular space infection: a potentially lethal infection*. Int J Infect Dis, 2009. **13**(3): p. 327-33. <https://doi.org/10.1016/j.ijid.2008.07.007>.
3. Rega, A.J., S.R. Aziz, and V.B. Ziccardi, *Microbiology and antibiotic sensitivities of head and neck space infections of odontogenic origin*. J Oral Maxillofac Surg, 2006. **64**(9): p. 1377-80. <https://doi.org/10.1016/j.joms.2006.05.023>.
4. Bender, F., et al., *Drug resistant bacteria in perianal abscesses are frequent and relevant*. Sci Rep, 2022. **12**(1): p. 14866. <https://doi.org/10.1038/s41598-022-19123-6>.
5. Liu, C.K., et al., *Clinical and microbiological analysis of adult perianal abscess*. J Microbiol Immunol Infect, 2011. **44**(3): p. 204-8. <https://doi.org/10.1016/j.jmii.2011.01.024>.
